# Supplementary material
Source: publisher figshare collection journal article supplement (https://acs.figshare.com/ndownloader/files/3735745)

# Octreotide-Mediated Tumor-Targeted Drug Delivery via a Cleavable Doxorubicin–Peptide Conjugate

*Marco Lelle<sup>a</sup>, Stefka Kaloyanova<sup>a</sup>, Christoph Freidel<sup>a</sup>, Marily Theodoropoulou<sup>b</sup>, Michael  
Musheev<sup>c</sup>, Christof Niehrs<sup>c,d</sup>, Günter Stalla<sup>b</sup> and Kalina Peneva<sup>\*a,e</sup>*

<sup>a</sup> Max Planck Institute for Polymer Research, Ackermannweg 10, 55128 Mainz, Germany

<sup>b</sup> Max Planck Institute for Psychiatry, Kraepelinstraße 2, 80804 Munich, Germany

<sup>c</sup> Institute of Molecular Biology, Ackermannweg 4, 55128 Mainz, Germany

<sup>d</sup> Division of Molecular Embryology, DKFZ-ZMBH Alliance, 69120 Heidelberg, Germany

<sup>e</sup> Institute of Organic Chemistry and Macromolecular Chemistry, Friedrich Schiller  
University Jena, Lessingstrasse 8, 07743 Jena

\*To whom correspondence should be addressed. Phone: +496131379136;

E-mail: [peneva@mpip-mainz.mpg.de](mailto:peneva@mpip-mainz.mpg.de)

*Synthesized compounds:*

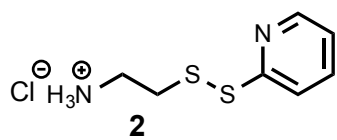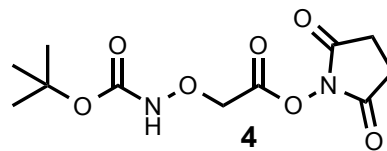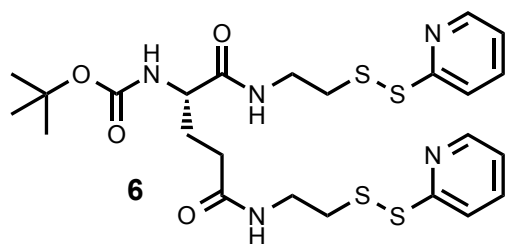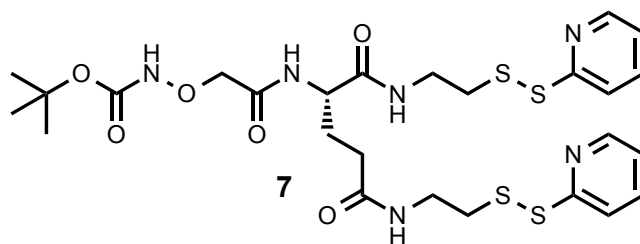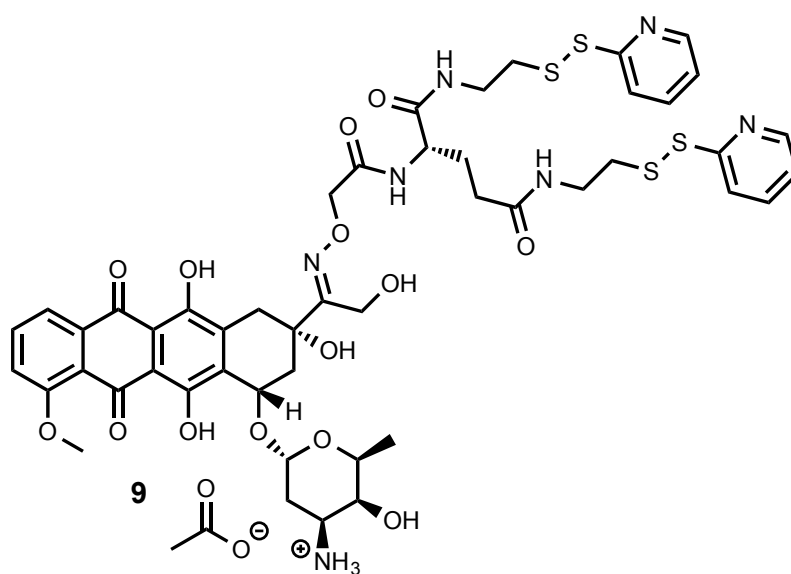

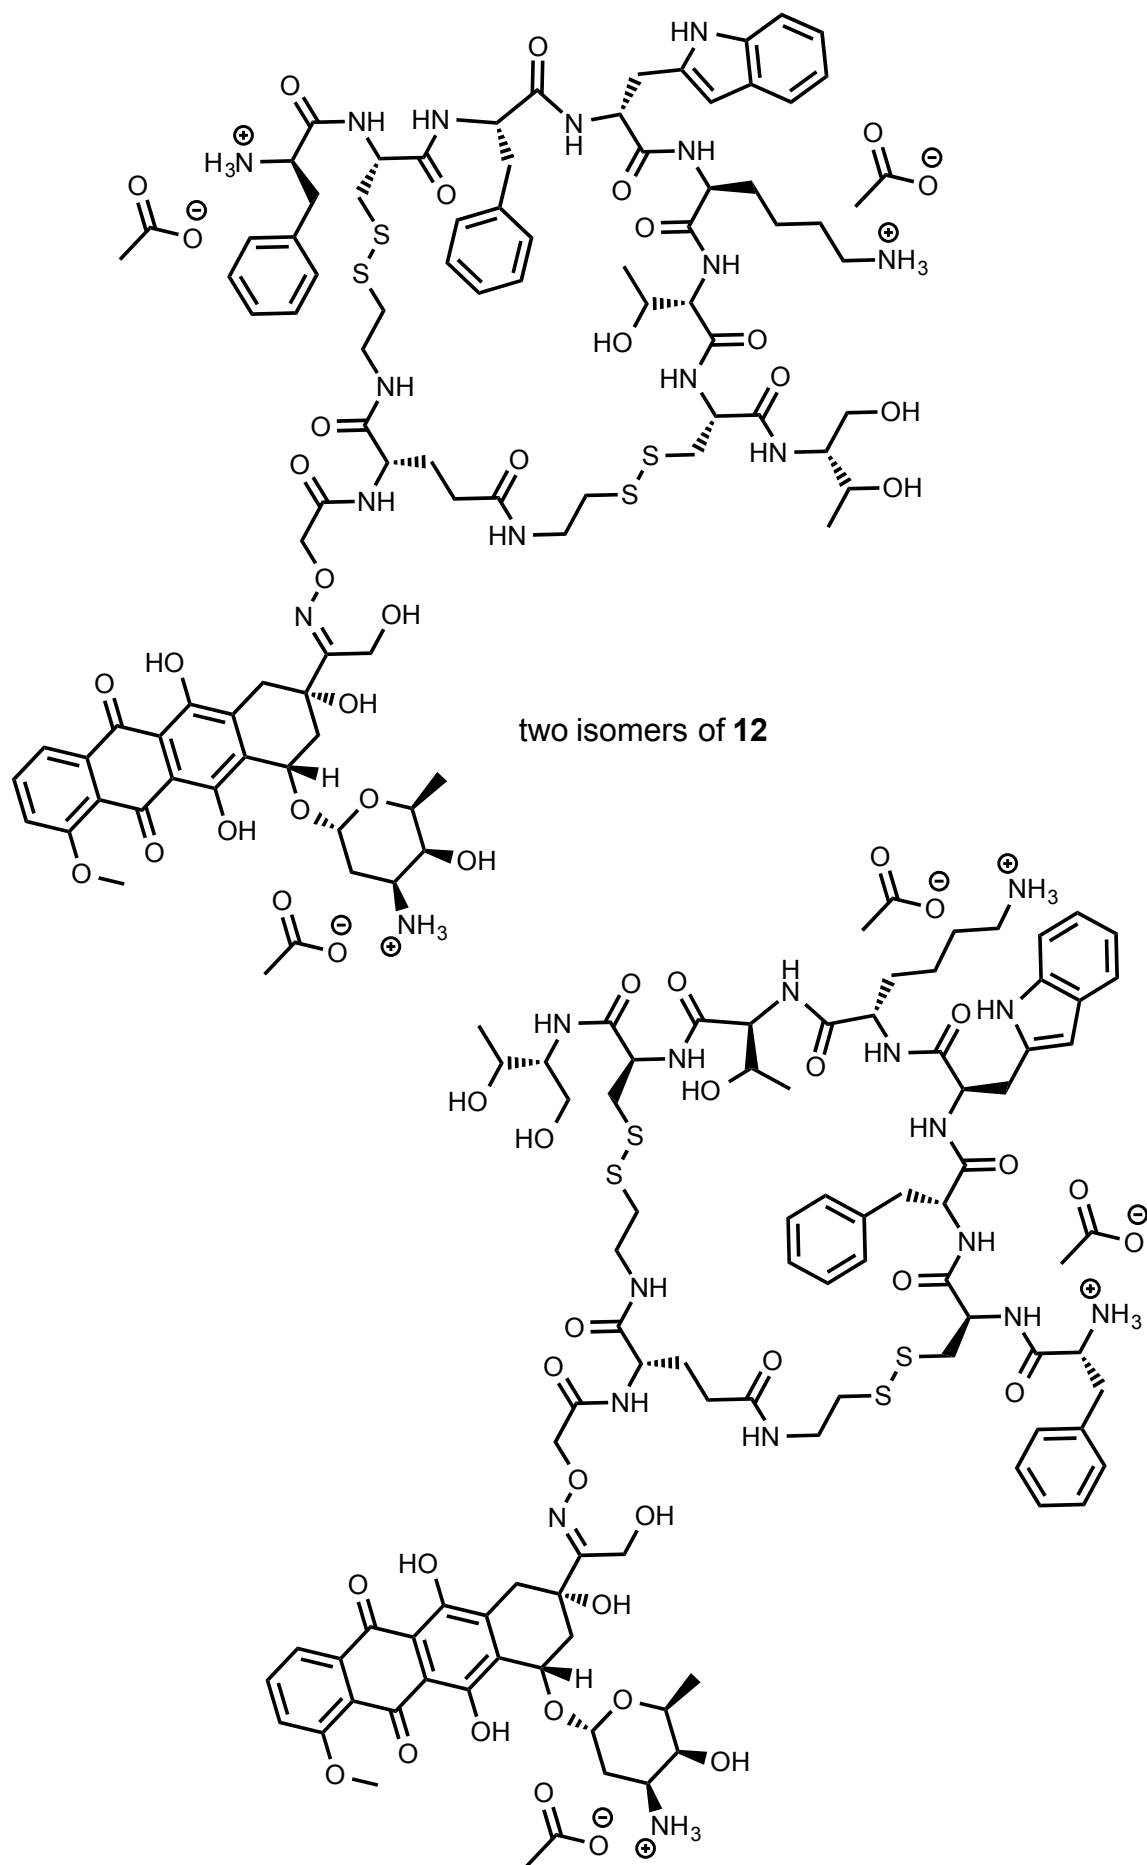

$^1\text{H}$  NMR spectrum of compound **2** recorded in  $\text{DMSO-}d^6$  at 300 MHz

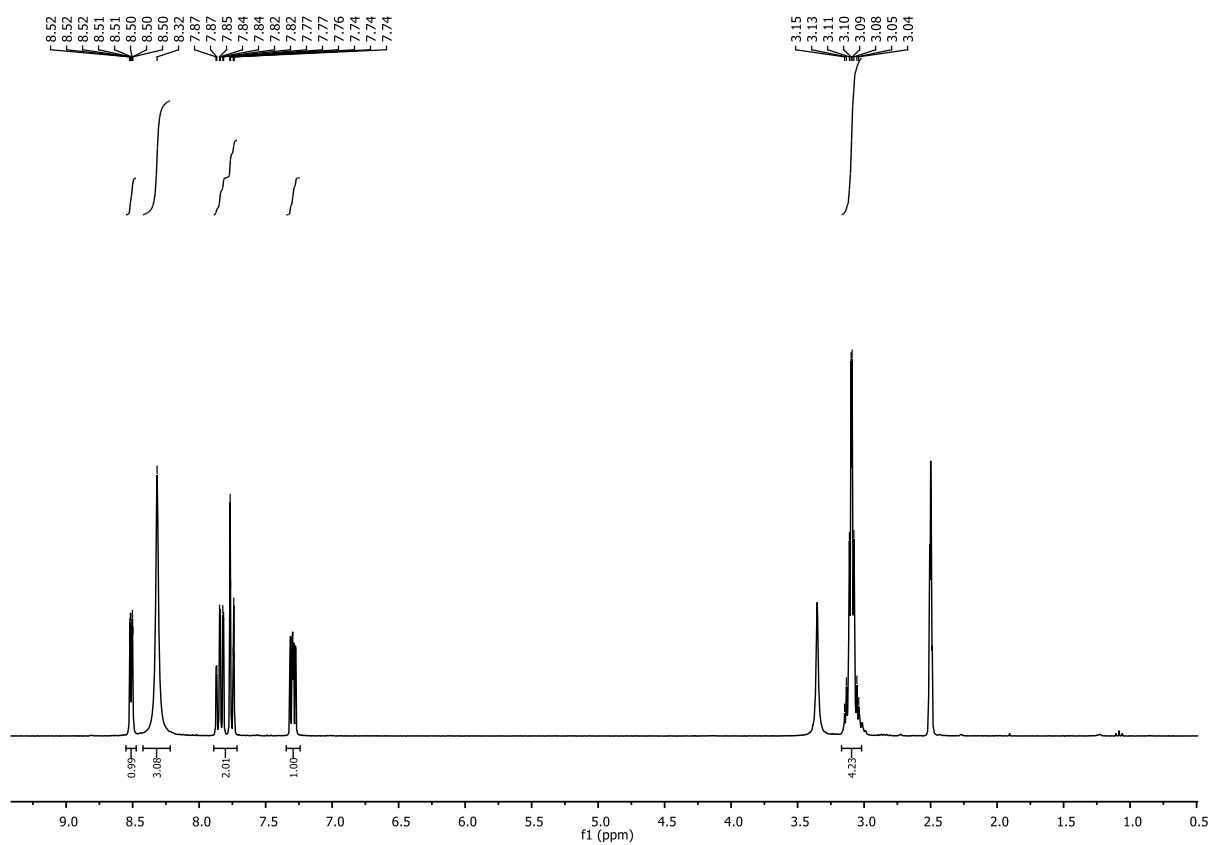

$^{13}\text{C}$  NMR spectrum of compound **2** recorded in  $\text{DMSO-}d^6$  at 75 MHz

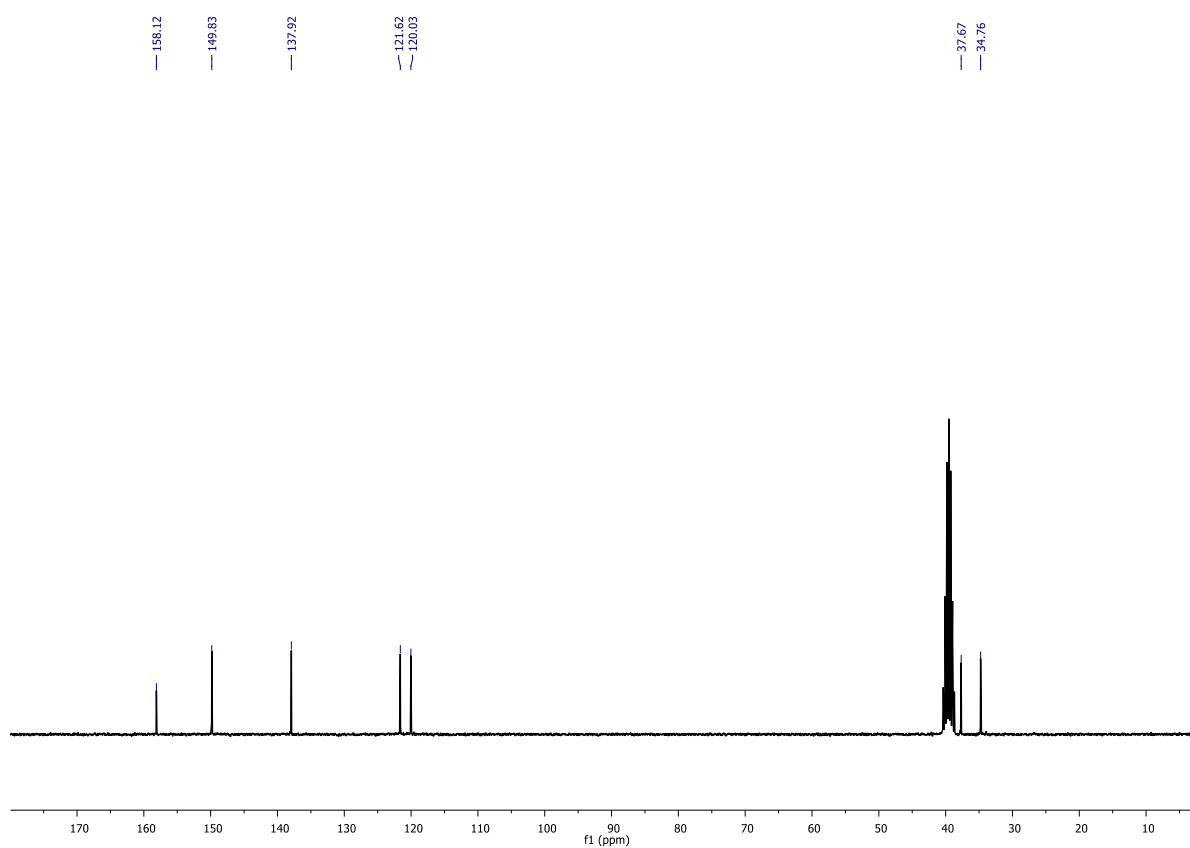

$^1\text{H}$  NMR spectrum of compound **4** recorded in  $\text{DMSO}-d^6$  at 300 MHz

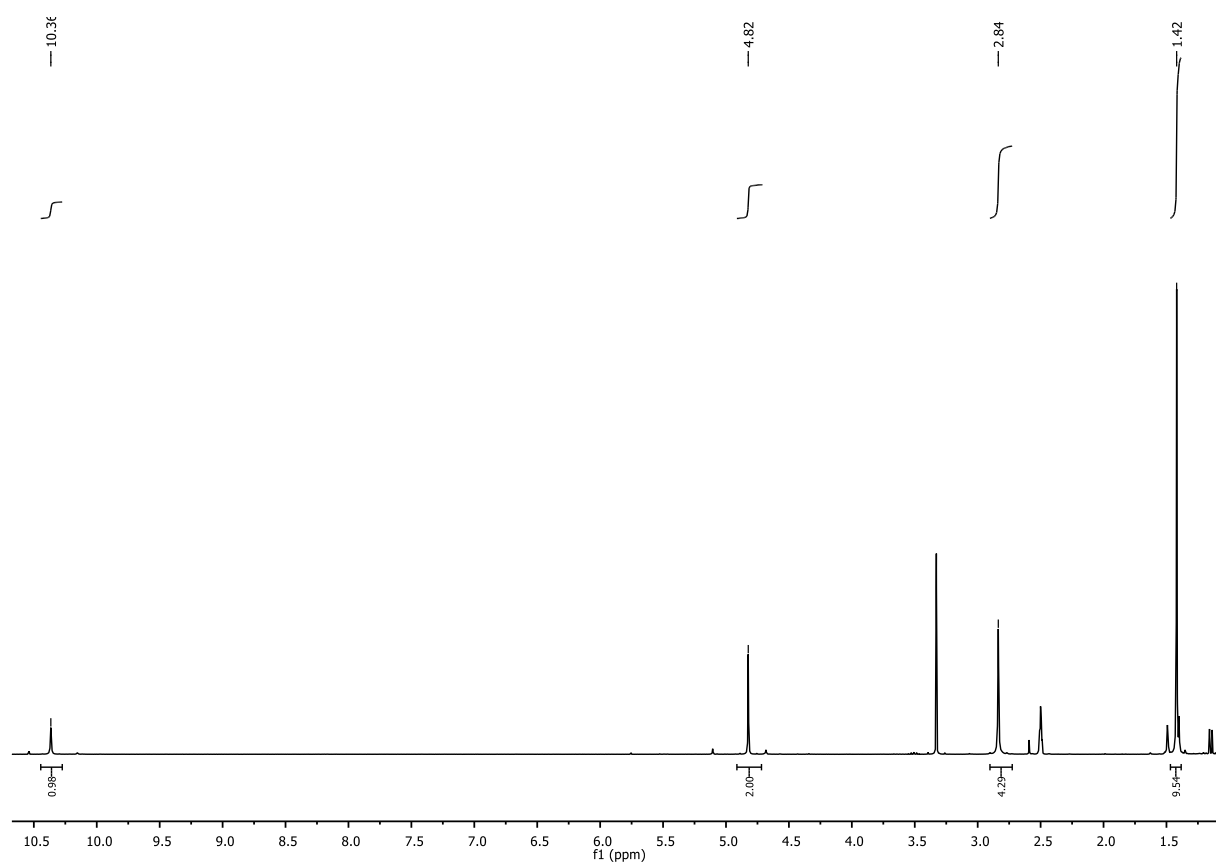

$^{13}\text{C}$  NMR spectrum of compound **4** recorded in  $\text{DMSO}-d^6$  at 75 MHz

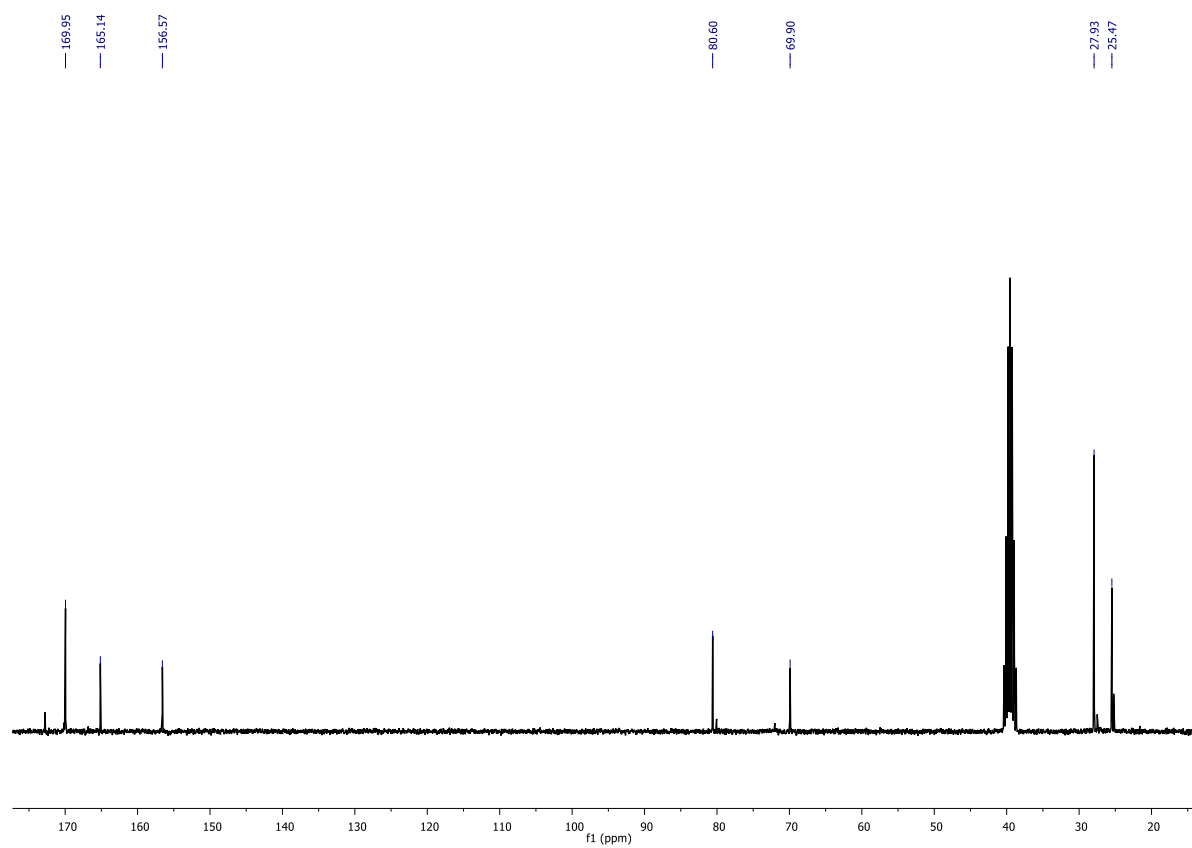

$^1\text{H}$  NMR spectrum of compound **6** recorded in  $\text{DMSO-}d^6$  at 300 MHz

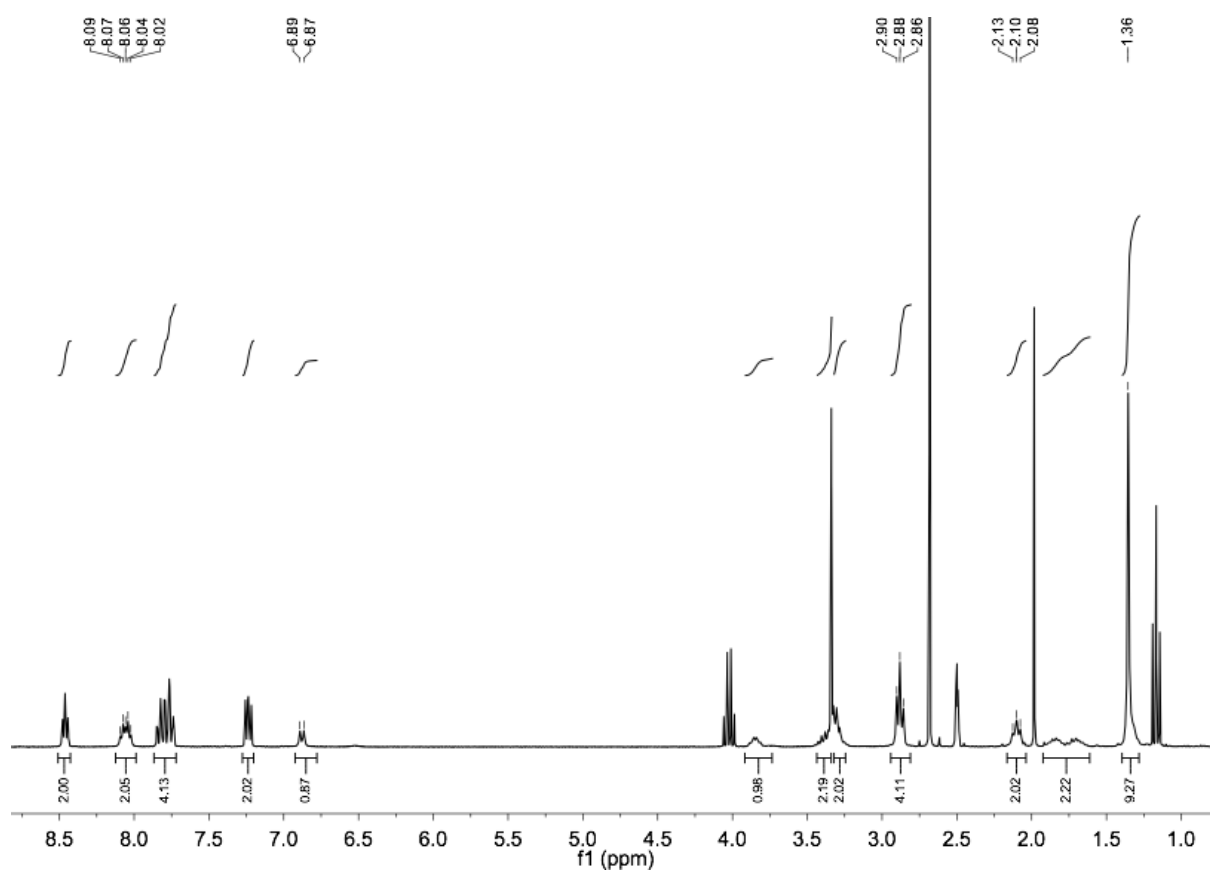

$^{13}\text{C}$  NMR spectrum of compound **6** recorded in  $\text{DMSO-}d^6$  at 75 MHz

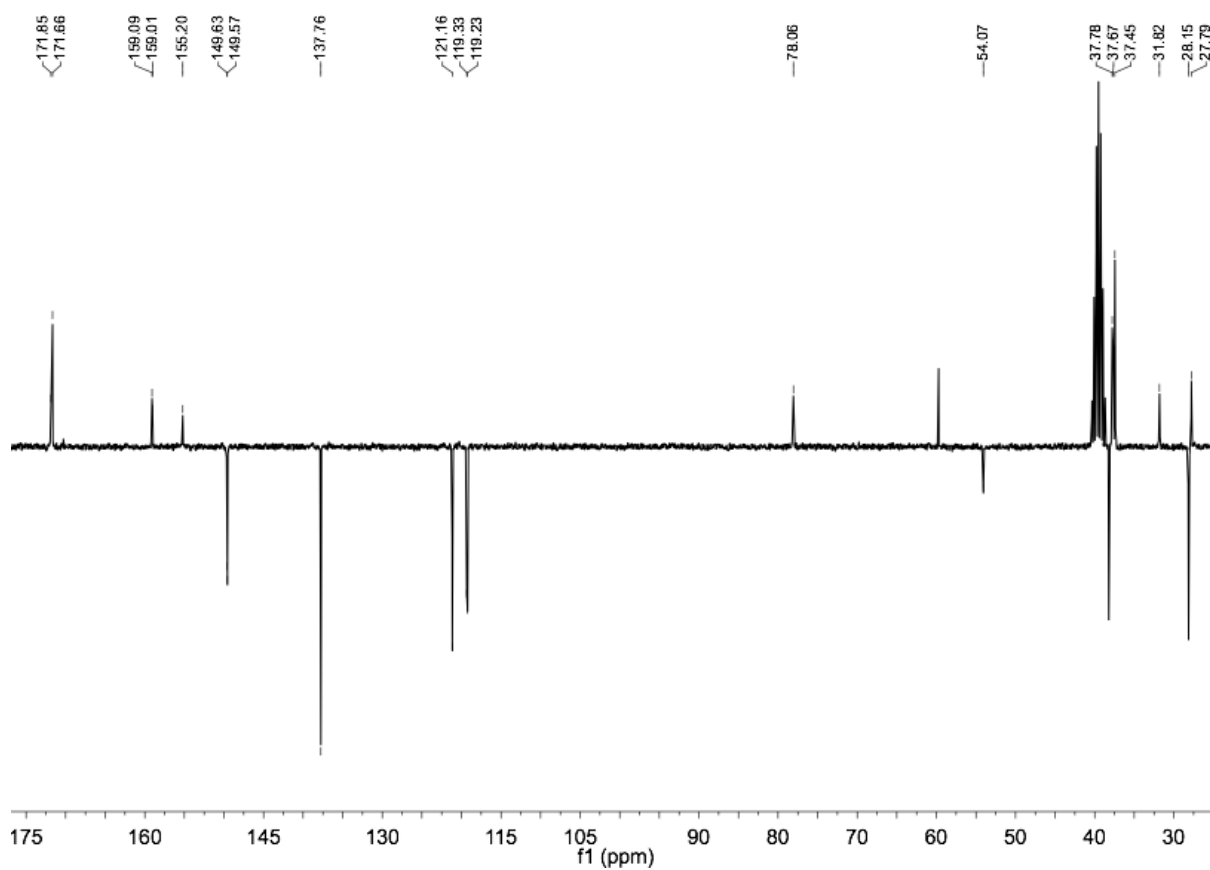

$^1\text{H}$  NMR spectrum of compound **7** recorded in  $\text{DMSO}-d_6$  at 300 MHz

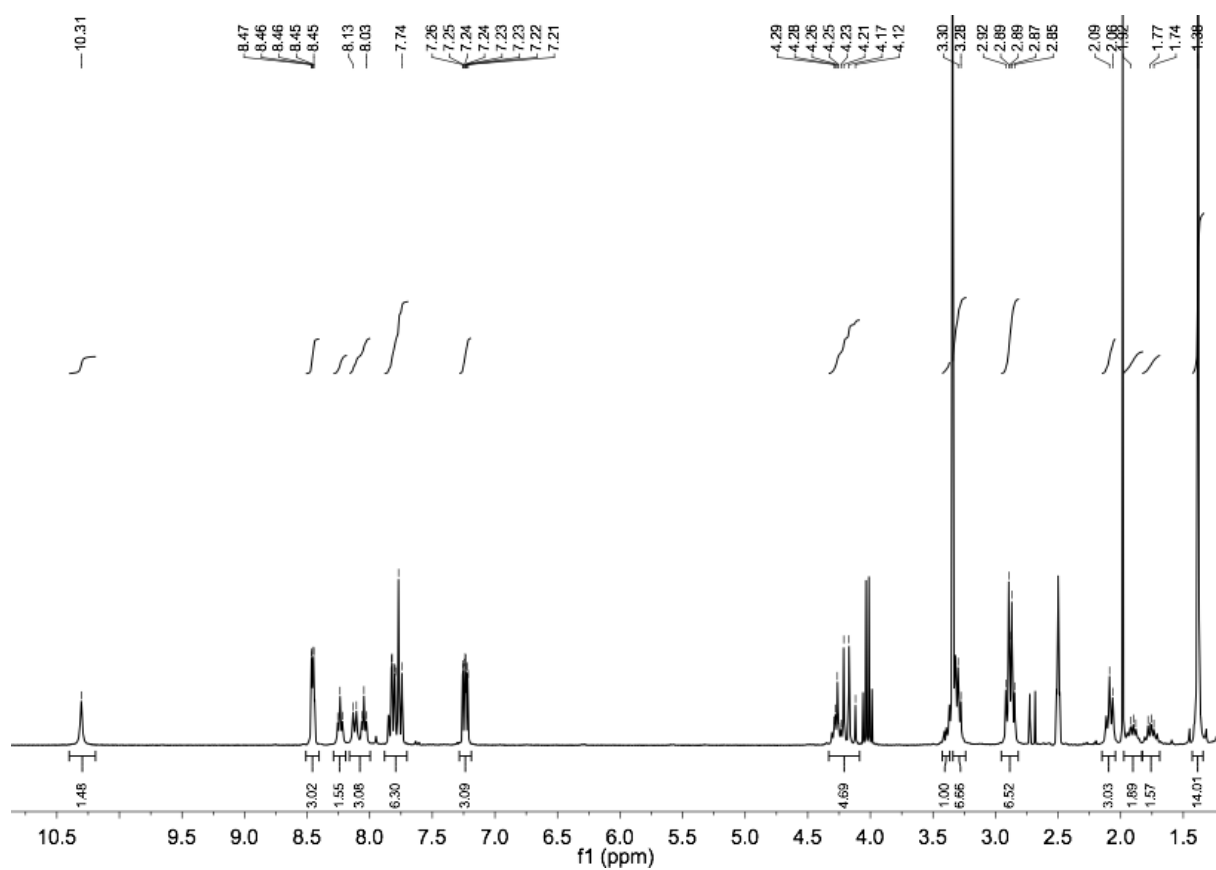

$^{13}\text{C}$  NMR spectrum of compound **7** recorded in  $\text{DMSO}-d_6$  at 75 MHz

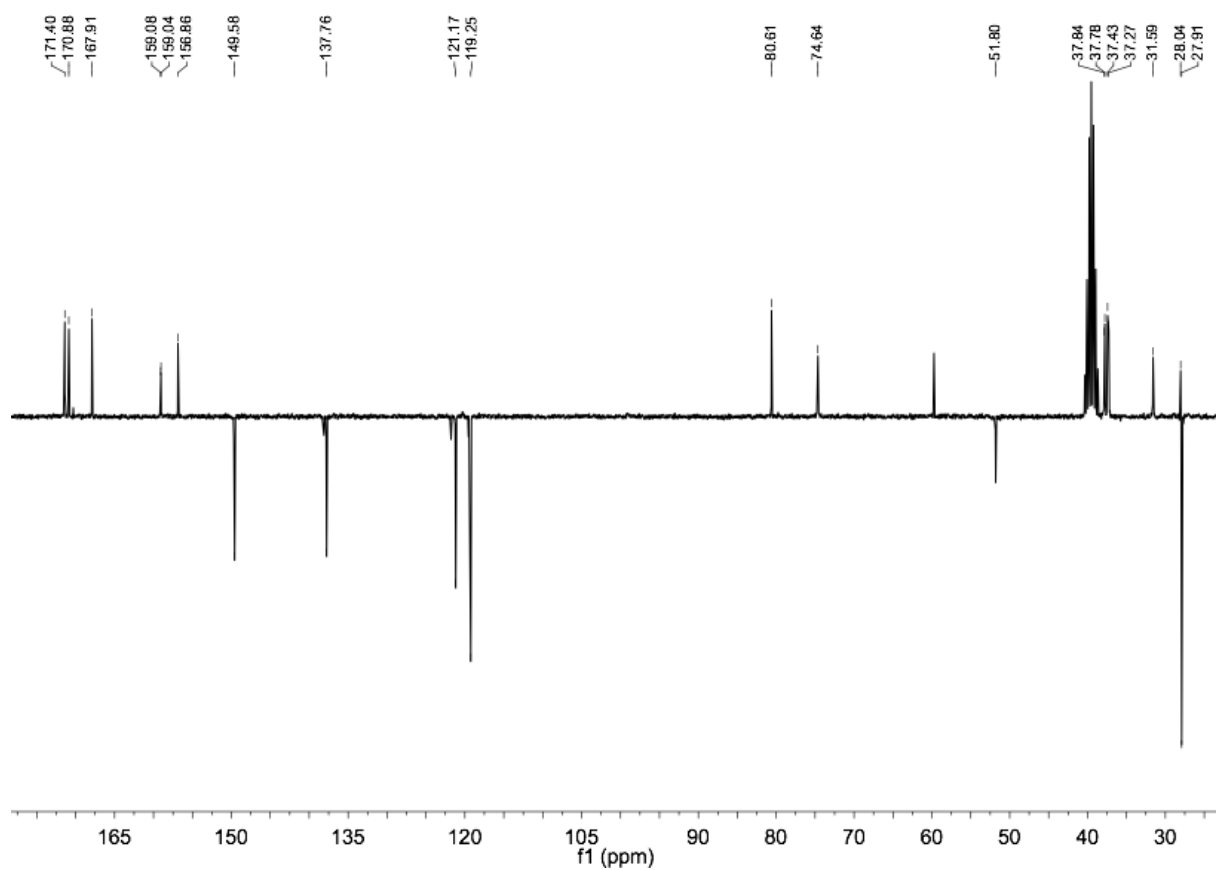

$^1\text{H}$  NMR spectrum of compound **9** recorded in  $\text{DMSO}-d_6$  at 850 MHz

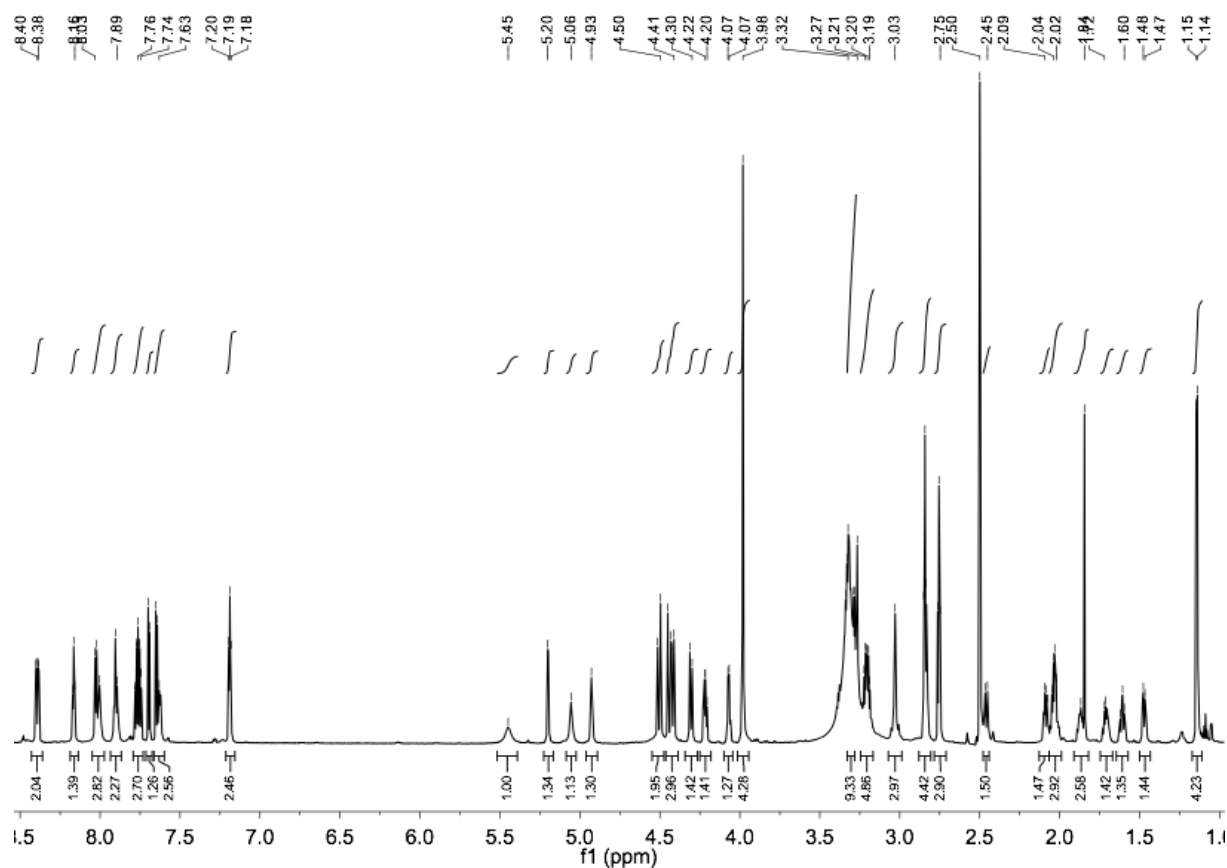

MALDI-TOF mass spectrum of compound **12** (matrix:  $\alpha$ -cyano-4-hydroxycinnamic acid)

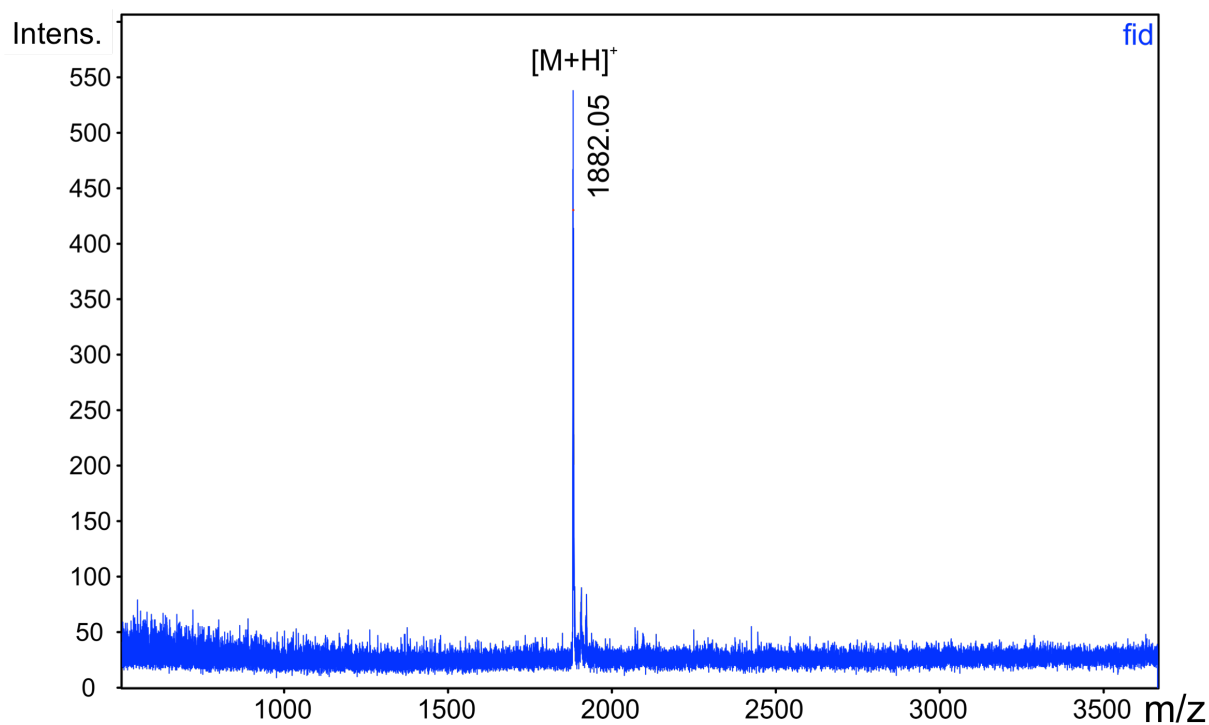



HPLC chromatogram of a sample from the reaction mixture (after 5 minutes) of the doxorubicin-octreotide conjugate formation, which is showing the two narrow peaks for both isomers of the hybrid **12** as well as the peak for the unreacted doxorubicin derivative **9**.

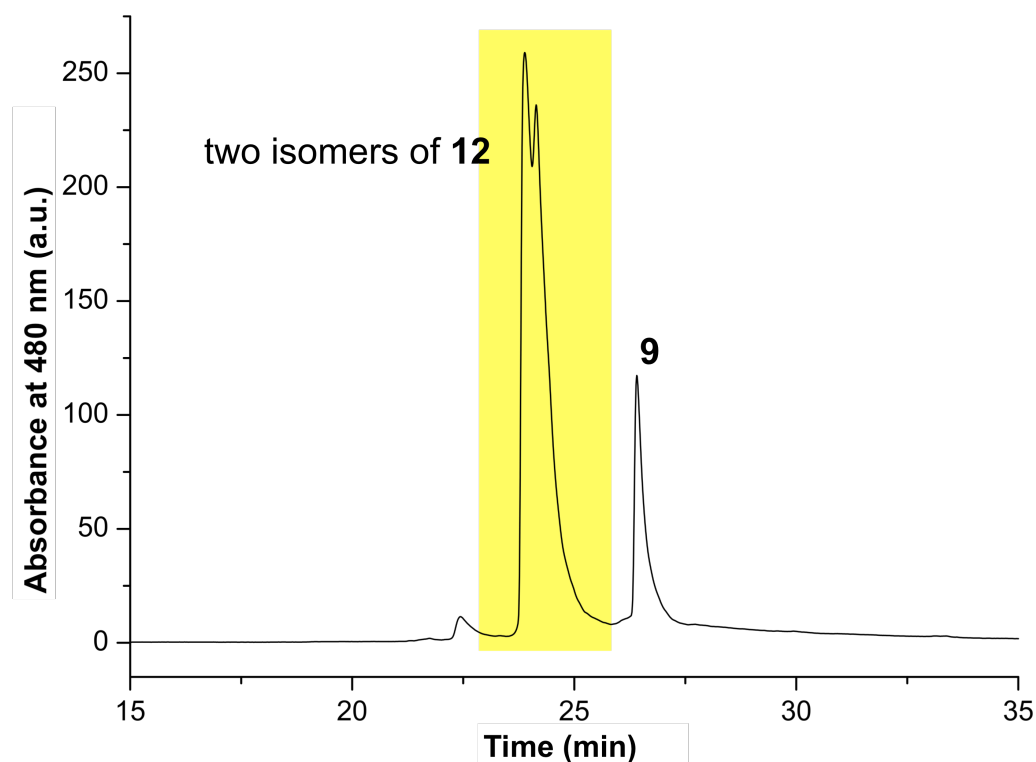

Cytotoxic effect of Dox-Oct conjugate (**12**) on A549 adenocarcinomic human alveolar basal epithelial cells (72 h after incubation with the compound) as determined by the CellTiter-Glo<sup>®</sup> luminescent cell viability assay.

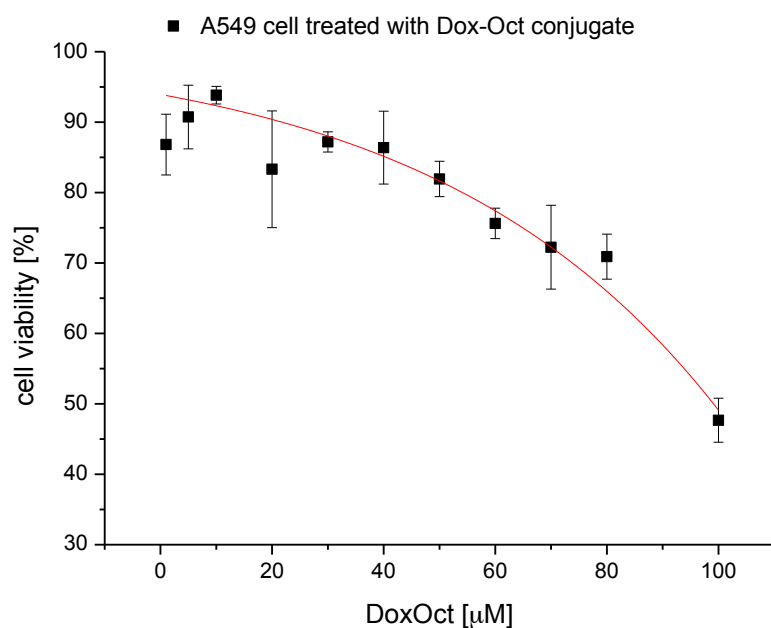

Supplement: Supplementary file 1 [file 3735745]
